# Supplementary material for: Carbonyl sulfide measurements from a South Pole ice core and implications for atmospheric variability since the last glacial period
Source: Copernicus journal article supplement (doi:10.5194/cp-2023-100), 2023-12-15
Supplement: Supplementary file [file cp-2023-100-RC1-supplement.pdf]

Derivation of Eq. (6):

$$\begin{cases} \frac{ssCa^{2+}}{ssNa^+} = R_m \\ \frac{nssCa^{2+}}{nssNa^+} = R_t \end{cases}$$

⇒

$$\begin{aligned} Ca^{2+} &= ssCa^{2+} + nssCa^{2+} \\ &= R_m ssNa^+ + R_t nssNa^+ \\ &= R_m ssNa^+ + R_t (Na^+ - ssNa^+) \end{aligned}$$

⇒

$$(R_t - R_m)ssNa^+ = R_t Na^+ - Ca^{2+}$$

⇒

$$ssNa^+ = \frac{R_t Na^+ - Ca^{2+}}{R_t - R_m} = \frac{Na^+ - \frac{Ca^{2+}}{R_t}}{1 - \frac{R_m}{R_t}}$$

⇒

$$\begin{aligned} nssCa^{2+} &= R_t (Na^+ - ssNa^+) \\ &= R_t Na^+ - \frac{R_t Na^+ - Ca^{2+}}{1 - \frac{R_m}{R_t}} \\ &= \frac{Ca^{2+} - R_m Na^+}{1 - \frac{R_m}{R_t}} \end{aligned}$$
